# Supplementary material
Source: bioRxiv or medRxiv preprint supplement (https://www.biorxiv.org/highwire/filestream/98958/field_highwire_adjunct_files/8/324194-8.pdf)
Supplement: Supplementary file [file 324194-8.pdf]

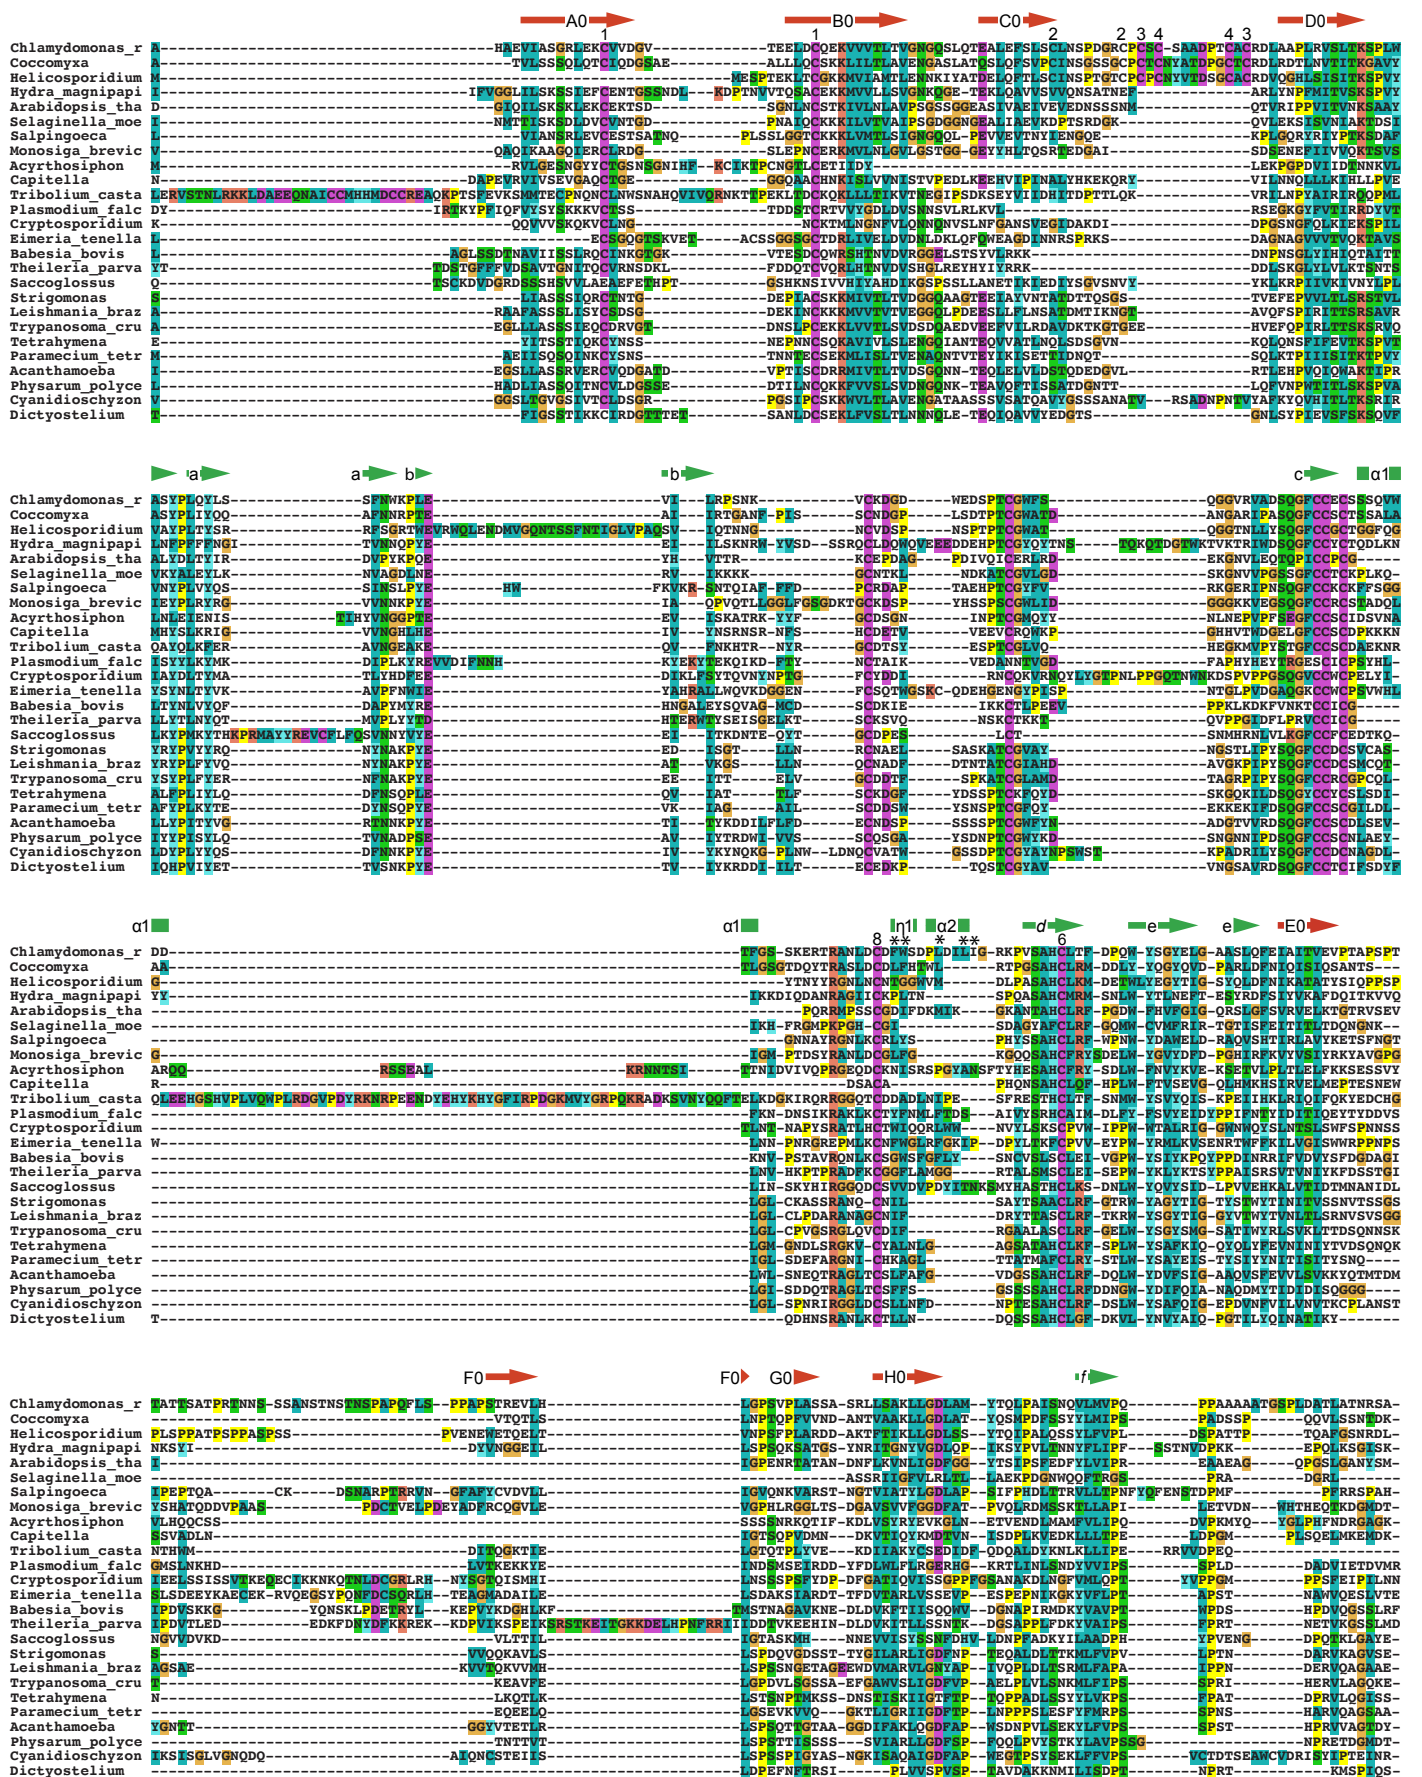

Supplemental Fig. 6
